# Supplementary material for: Viscoelastic properties of the Achilles tendon in vivo
Source: PubMed Central journal article supplement (PMC3661039; doi:10.1186/2193-1801-2-212), 2013-05-08

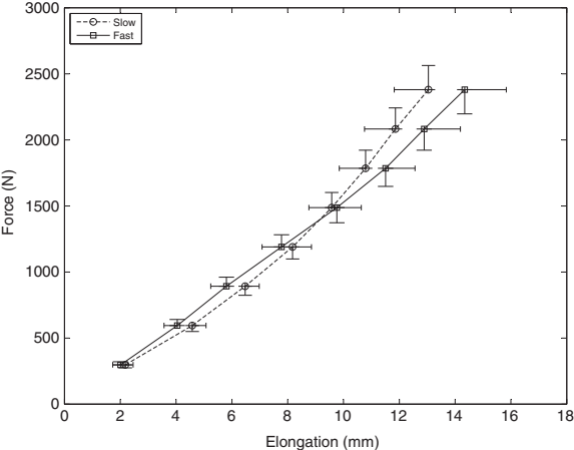

Supplement: 40064_2013_271_MOESM4_ESM.pdf [file 40064_2013_271_MOESM4_ESM.pdf]
